# Supplementary material
Source: MDPI journal article supplement (https://www.mdpi.com/2227-9040/7/3/40)
Supplement: s1 [file s1]

## Supplementary Materials

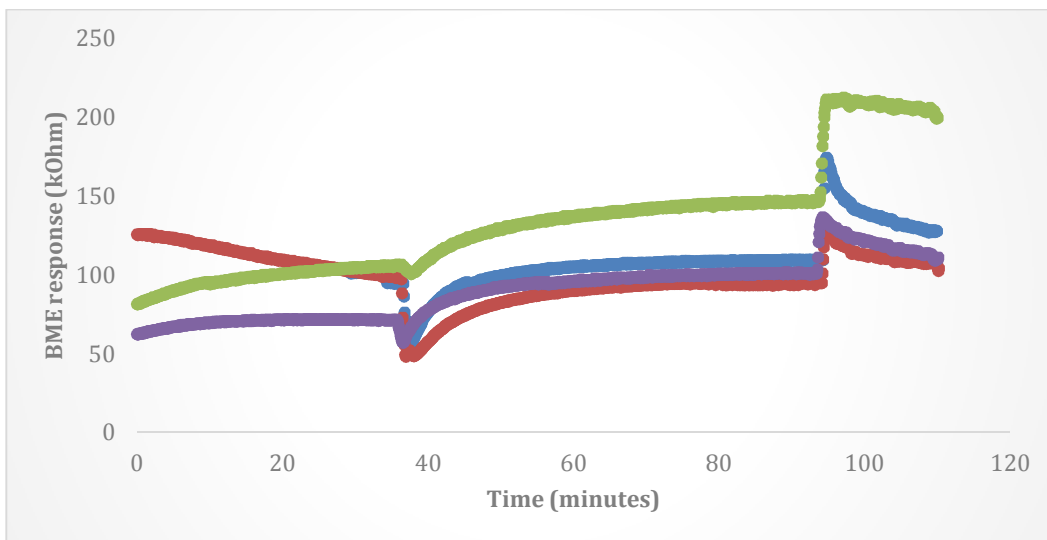

Figure S1. Graph of BME680 Sensor Response. Toluene inserted at approximately 38 minutes, sensors moved to clean air at approximately the 95 minute mark. Each color denotes a sensor.

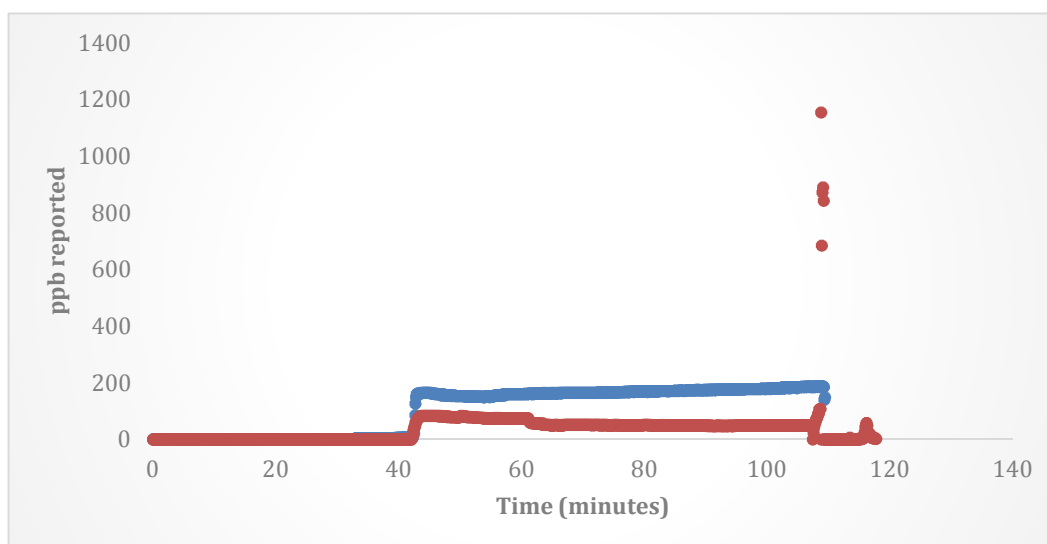

Figure S2. Graph of CCS811 Sensor Response. Toluene inserted at approximately 43 minutes, sensors moved to clean air at approximately the 110 minute mark. Each color denotes a sensor.

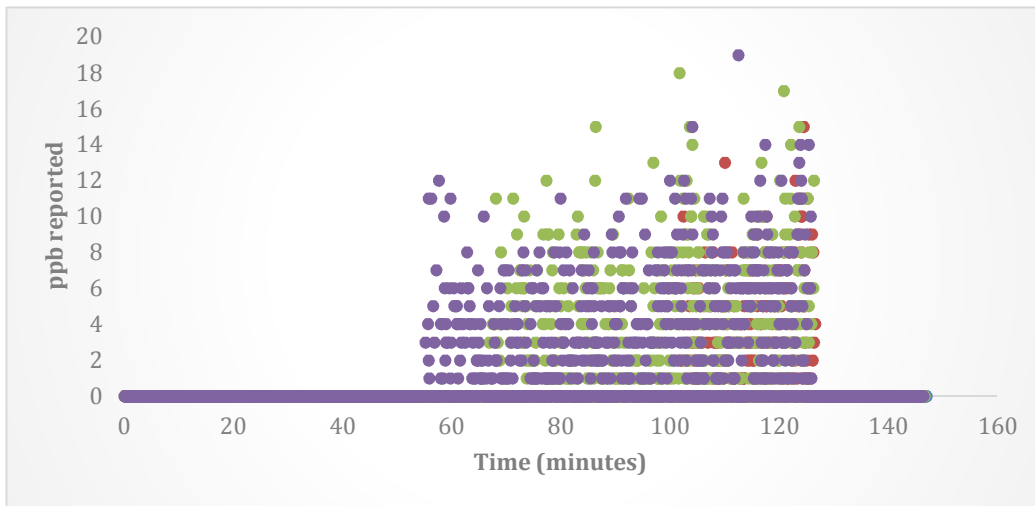

Figure S3. Graph of SGP30 Sensor Response. Toluene inserted at approximately 55 minutes, sensors moved to clean air at approximately the 126 minute mark. Each color denotes a sensor.

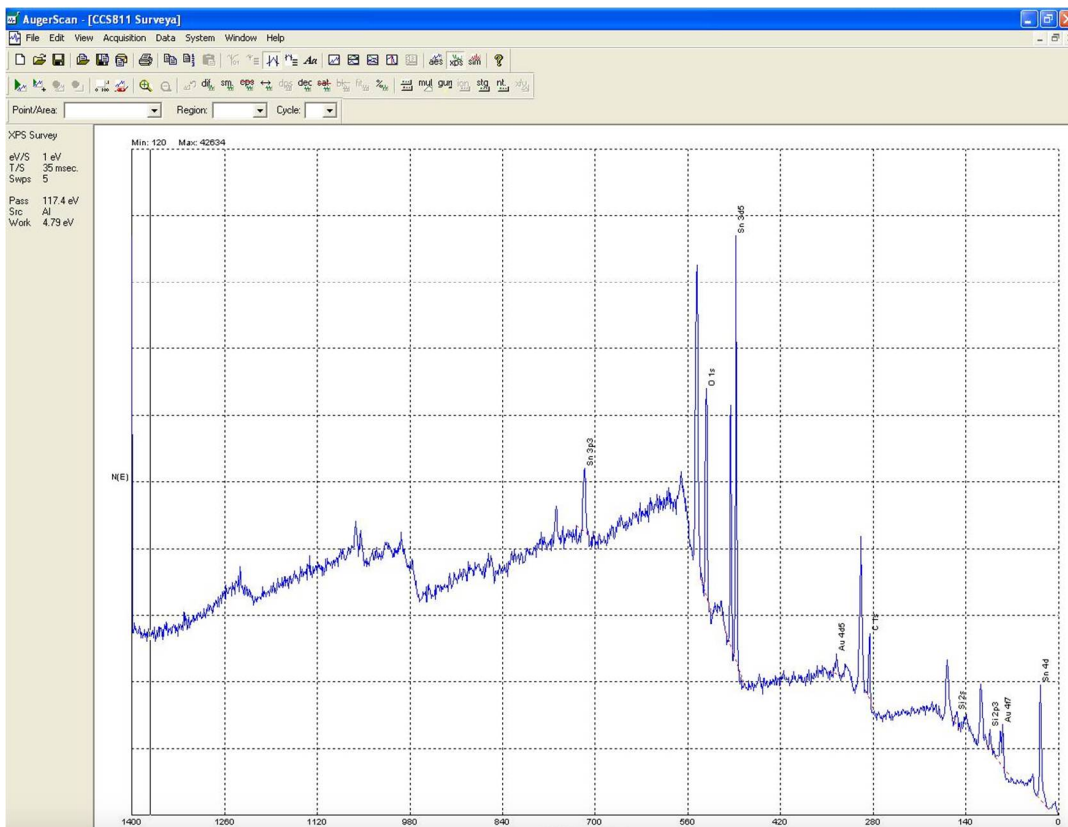

Figure S4. XPS Analysis of CCS811 Sensor MOx film

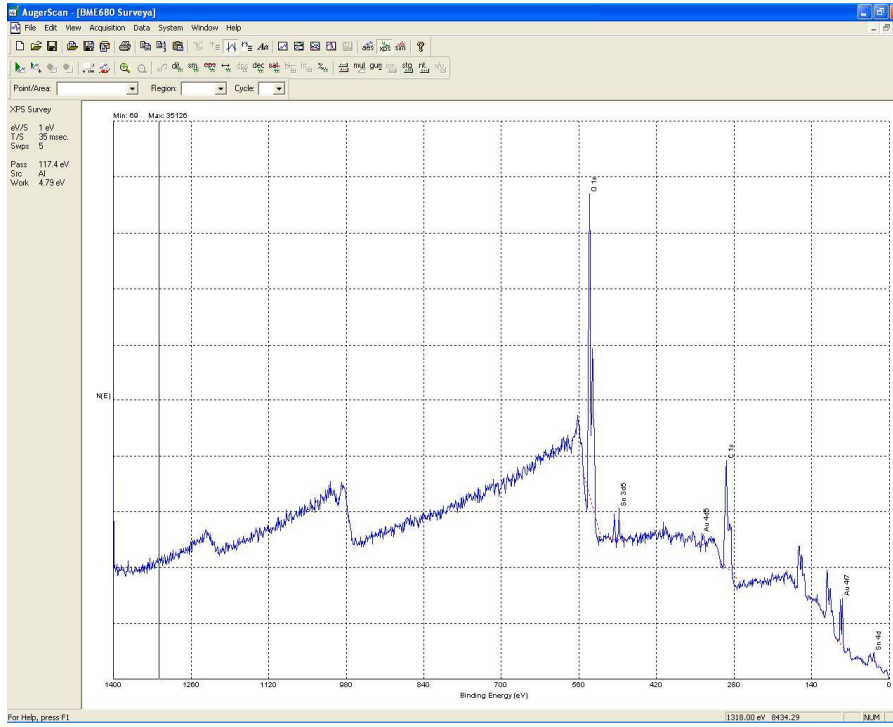

Figure S5. XPS Analysis of BME680 Sensor MOx film
